# Supplementary material for: Sequencing Analysis of MUC6 and MUC16 Gene Fragments in Patients with Oropharyngeal Squamous Cell Carcinoma Reveals Novel Mutations: A Preliminary Study
Source: MDPI journal article supplement (doi:10.3390/cimb45070356), 2023-07-04
Supplement: s1 [file s1]

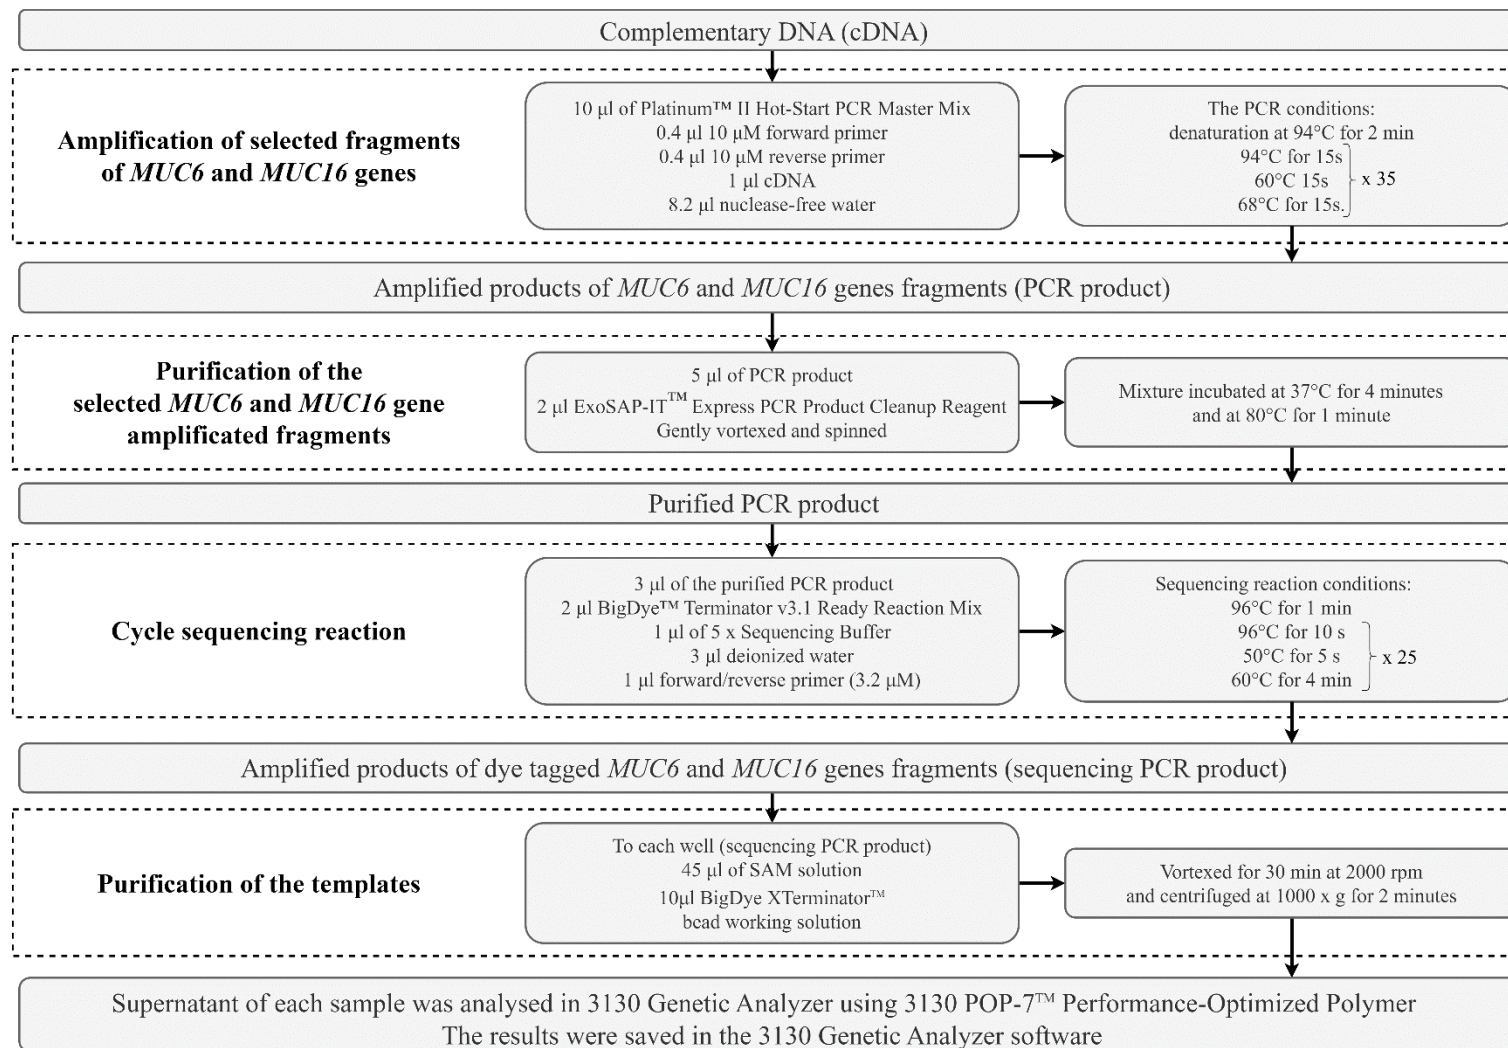

**Figure S1.** The workflow diagram of wet-laboratory steps (samples preparation and sequencing reaction).

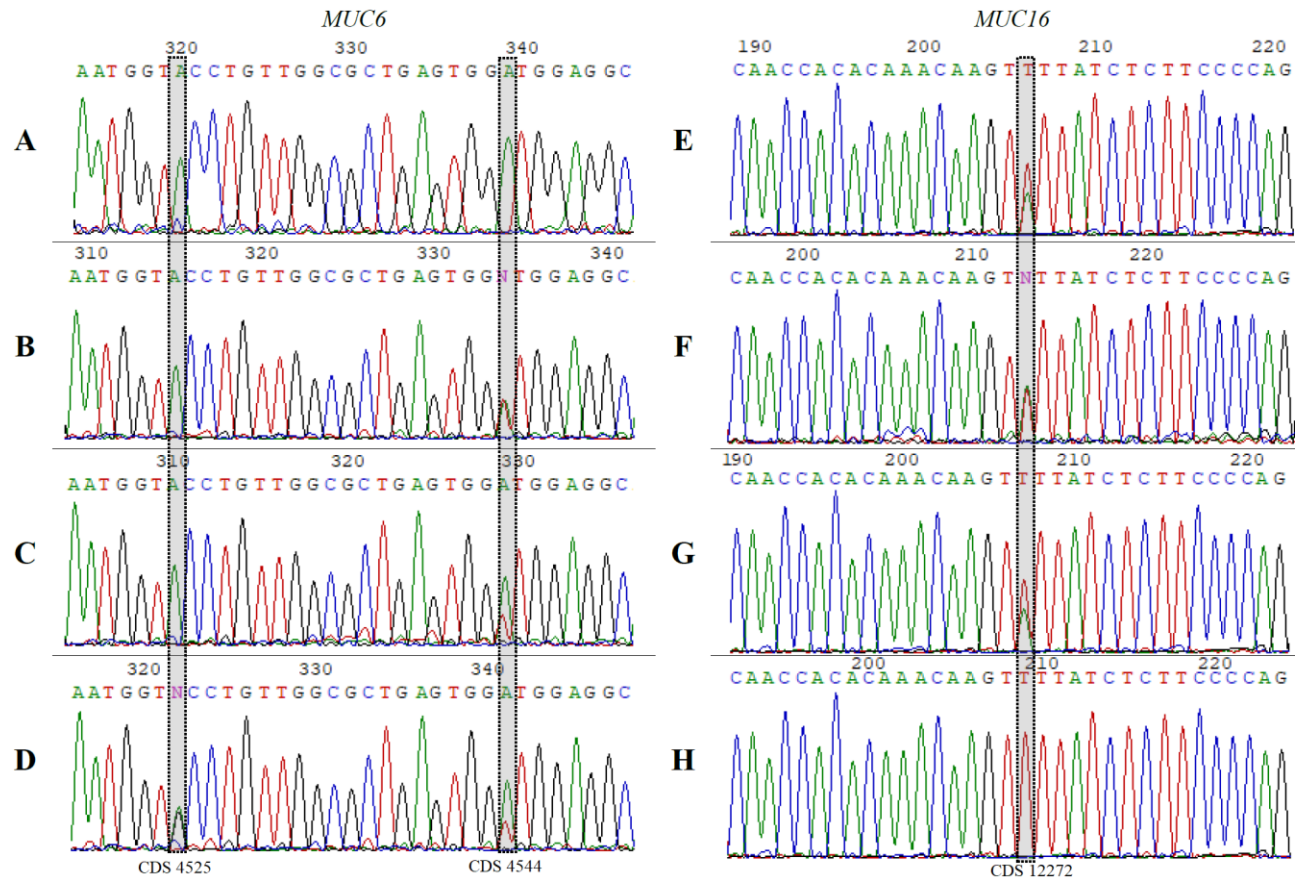

**Figure S2.** Electropherograms of Sanger sequencing traces for *MUC6* ENST00000421673.7 (A, B, C, D) and *MUC16* ENST00000397910.8 (E, F, G, H). (A) The absence of mutation A>G in CDS at position 4525 and the presence of a mutation C>A in CDS at position 4544 were found in the *MUC6* fragment from tumour sample ID 39. (B) The absence of mutation A>G in CDS at position 4525 and the presence of a mutation C>A in CDS at position 4544 were found in the *MUC6* fragment from tumour sample ID 47. (C) The absence of mutation A>G in CDS at position 4525 and the presence of a mutation C>A in CDS at position 4544 were found in the *MUC6* fragment from margin tissue sample ID 48. (D) The presence of mutation A>G in CDS at position 4525 and presence of mutation C>A in CDS at position 4544 were found in the *MUC6* fragment from margin tissue sample ID 90. (E) The presence of mutation T>A in CDS at position 12272 was found in the *MUC16* fragment from tumour sample ID 37. (F) The presence of mutation T>A in CDS at position 12272 was found in the *MUC16* fragment from tumour sample ID 47. (G) The presence of mutation T>A in CDS at position 12272 was found in the *MUC16* fragment from margin tissue sample ID 48. (H) The presence of mutation T>A in CDS at position 12272 was found in the *MUC16* fragment from margin tissue sample ID 90. Electropherograms of Sanger sequencing traces were prepared in GeneStudio™ Pro 2.2.0.0 software (GeneStudio Inc., Suwanee, GA, USA).

**Table S1.** Accepted and rejected sequencing results.

| Patient | Tumour samples |                           |                            | Margin samples |                           |                            |
|---------|----------------|---------------------------|----------------------------|----------------|---------------------------|----------------------------|
|         | ID             | <i>MUC6</i><br>sequencing | <i>MUC16</i><br>sequencing | ID             | <i>MUC6</i><br>sequencing | <i>MUC16</i><br>sequencing |
| 1       | 11             | Yes                       | Yes                        | 12             | No                        | No                         |
| 2       | 15             | No                        | Yes                        | 16             | Yes                       | Yes                        |
| 3       | 25             | No                        | No                         | 26             | Yes                       | No                         |
| 4       | 29             | Yes                       | No                         | 30             | No                        | Yes                        |
| 5       | 33             | No                        | Yes                        | 34             | Yes                       | No                         |
| 6       | 37             | Yes                       | Yes                        | 38             | No                        | No                         |
| 7       | 39             | Yes                       | No                         | 40             | No                        | No                         |
| 8       | 41             | No                        | Yes                        | 42             | Yes                       | Yes                        |
| 9       | 45             | Yes                       | No                         | 46             | No                        | No                         |
| 10      | 47             | Yes                       | Yes                        | 48             | Yes                       | Yes                        |
| 11      | 49             | Yes                       | Yes                        | 50             | Yes                       | Yes                        |
| 12      | 53             | Yes                       | No                         | 54             | Yes                       | Yes                        |
| 13      | 55             | Yes                       | No                         | 56             | Yes                       | Yes                        |
| 14      | 57             | Yes                       | Yes                        | 58             | Yes                       | Yes                        |
| 15      | 61             | Yes                       | No                         | 62             | Yes                       | Yes                        |
| 16      | 63             | No                        | Yes                        | 64             | Yes                       | Yes                        |
| 17      | 79             | Yes                       | Yes                        | 80             | Yes                       | Yes                        |
| 18      | 89             | No                        | No                         | 90             | Yes                       | Yes                        |

ID - sample identifier

**Table S2.** Detailed information of investigated *MUC6* (ENSG00000184956) mutations.

| SAMPLE ID | SAMPLE TYPE | CHROM | POS     | REF | ALT | HGVSc                       | HGVSp                          | Consequence        | IMPACT   | Amino acids | Existing variation | VARIANT CLASS | SIFT                              | PolyPhen                  |
|-----------|-------------|-------|---------|-----|-----|-----------------------------|--------------------------------|--------------------|----------|-------------|--------------------|---------------|-----------------------------------|---------------------------|
| 11        | G           | chr11 | 1018257 | A   | T   | ENST00000421673.7:c.4544C>A | ENSP00000406861.2:p.Leu1515Ter | stop gained        | HIGH     | L/*         |                    | SNV           |                                   |                           |
| 11        | G           | chr11 | 1018258 | C   | T   | ENST00000421673.7:c.4543T>A | ENSP00000406861.2:p.Ala1515Thr | missense variant   | MODERATE | A/T         |                    | SNV           | deleterious low confidence (0.04) | benign (0.026)            |
| 16        | M           | chr11 | 1018257 | A   | T   | ENST00000421673.7:c.4544C>A | ENSP00000406861.2:p.Leu1515Ter | stop gained        | HIGH     | L/*         |                    | SNV           |                                   |                           |
| 29        | G           | chr11 | 1018257 | A   | T   | ENST00000421673.7:c.4544C>A | ENSP00000406861.2:p.Leu1515Ter | stop gained        | HIGH     | L/*         |                    | SNV           |                                   |                           |
| 34        | M           | chr11 | 1018257 | A   | T   | ENST00000421673.7:c.4544C>A | ENSP00000406861.2:p.Leu1515Ter | stop gained        | HIGH     | L/*         |                    | SNV           |                                   |                           |
| 34        | M           | chr11 | 1018465 | T   | C   | ENST00000421673.7:c.4336C>G | ENSP00000406861.2:p.Asn1446Asp | missense variant   | MODERATE | N/D         | COSV70139063       | SNV           | deleterious (0.02)                | benign (0.019)            |
| 39        | G           | chr11 | 1018257 | A   | T   | ENST00000421673.7:c.4544C>A | ENSP00000406861.2:p.Leu1515Ter | stop gained        | HIGH     | L/*         |                    | SNV           |                                   |                           |
| 39        | G           | chr11 | 1018322 | A   | G   | ENST00000421673.7:c.4479A>C | ENSP00000406861.2:p.Thr1493%3D | synonymous variant | LOW      | T           |                    | SNV           |                                   |                           |
| 39        | G           | chr11 | 1018506 | C   | T,A | ENST00000421673.7:c.4295C>A | ENSP00000406861.2:p.Ser1432Asn | missense variant   | MODERATE | S/N         |                    | SNV           | tolerated low confidence (0.14)   | benign (0.212)            |
| 42        | M           | chr11 | 1018257 | A   | T   | ENST00000421673.7:c.4544C>A | ENSP00000406861.2:p.Leu1515Ter | stop gained        | HIGH     | L/*         |                    | SNV           |                                   |                           |
| 42        | M           | chr11 | 1018543 | A   | G   | ENST00000421673.7:c.4258G>C | ENSP00000406861.2:p.Cys1420Arg | missense variant   | MODERATE | C/R         |                    | SNV           | tolerated (0.06)                  | probably damaging (0.921) |
| 45        | G           | chr11 | 1018111 | C   | T,A | ENST00000421673.7:c.4690G>A | ENSP00000406861.2:p.Ala1564Thr | missense variant   | MODERATE | A/T         |                    | SNV           | tolerated (0.2)                   | benign (0.007)            |
| 45        | G           | chr11 | 1018257 | A   | T   | ENST00000421673.7:c.4544C>A | ENSP00000406861.2:p.Leu1515Ter | stop gained        | HIGH     | L/*         |                    | SNV           |                                   |                           |
| 47        | G           | chr11 | 1018243 | C   | T   |                             | ENSP00000406861.2:p.Glu1520Lys | missense variant   | MODERATE | E/K         |                    | SNV           |                                   |                           |
| 47        | G           | chr11 | 1018257 | A   | T   | ENST00000421673.7:c.4544C>A | ENSP00000406861.2:p.Leu1515Ter | stop gained        | HIGH     | L/*         |                    | SNV           |                                   |                           |
| 48        | M           | chr11 | 1018257 | A   | T   | ENST00000421673.7:c.4544C>A | ENSP00000406861.2:p.Leu1515Ter | stop gained        | HIGH     | L/*         |                    | SNV           |                                   |                           |
| 50        | M           | chr11 | 1018257 | A   | T   | ENST00000421673.7:c.4544C>A | ENSP00000406861.2:p.Leu1515Ter | stop gained        | HIGH     | L/*         |                    | SNV           |                                   |                           |
| 53        | G           | chr11 | 1018257 | A   | T   | ENST00000421673.7:c.4544C>A | ENSP00000406861.2:p.Leu1515Ter | stop gained        | HIGH     | L/*         |                    | SNV           |                                   |                           |
| 54        | M           | chr11 | 1018257 | A   | T   | ENST00000421673.7:c.4544C>A | ENSP00000406861.2:p.Leu1515Ter | stop gained        | HIGH     | L/*         |                    | SNV           |                                   |                           |

| SAMPLE ID | SAMPLE TYPE | CHROM | POS     | REF | ALT  | HGVSc                       | HGVSp                          | Consequence        | IMPACT   | Amino acids | Existing variation | VARIANT CLASS | SIFT                              | PolyPhen       |
|-----------|-------------|-------|---------|-----|------|-----------------------------|--------------------------------|--------------------|----------|-------------|--------------------|---------------|-----------------------------------|----------------|
| 55        | G           | chr11 | 1018180 | C   | T    | ENST00000421673.7:c.4621T>A | ENSP00000406861.2:p.Ala1541Thr | missense variant   | MODERATE | A/T         |                    | SNV           | tolerated (0.86)                  | benign (0.021) |
| 55        | G           | chr11 | 1018257 | A   | T    | ENST00000421673.7:c.4544C>A | ENSP00000406861.2:p.Leu1515Ter | stop gained        | HIGH     | L/*         |                    | SNV           |                                   |                |
| 56        | M           | chr11 | 1018381 | C   | T    | ENST00000421673.7:c.4420G>A | ENSP00000406861.2:p.Ala1474Thr | missense variant   | MODERATE | A/T         |                    | SNV           | tolerated low confidence (0.6)    | benign (0)     |
| 56        | M           | chr11 | 1018513 | C   | A,T  | ENST00000421673.7:c.4288A>T | ENSP00000406861.2:p.Ala1430Ser | missense variant   | MODERATE | A/S         |                    | SNV           | tolerated low confidence (0.21)   | benign (0.045) |
| 57        | G           | chr11 | 1018257 | A   | T    | ENST00000421673.7:c.4544C>A | ENSP00000406861.2:p.Leu1515Ter | stop gained        | HIGH     | L/*         |                    | SNV           |                                   |                |
| 58        | M           | chr11 | 1018257 | A   | T    | ENST00000421673.7:c.4544C>A | ENSP00000406861.2:p.Leu1515Ter | stop gained        | HIGH     | L/*         |                    | SNV           |                                   |                |
| 58        | M           | chr11 | 1018297 | G   | A    | ENST00000421673.7:c.4504A>T | ENSP00000406861.2:p.Leu1502%3D | synonymous variant | LOW      | L           | COSV70138702       | SNV           |                                   |                |
| 61        | G           | chr11 | 1018257 | A   | T    | ENST00000421673.7:c.4544C>A | ENSP00000406861.2:p.Leu1515Ter | stop gained        | HIGH     | L/*         |                    | SNV           |                                   |                |
| 62        | M           | chr11 | 1018257 | A   | T    | ENST00000421673.7:c.4544C>A | ENSP00000406861.2:p.Leu1515Ter | stop gained        | MODERATE | L/*         |                    | SNV           |                                   |                |
| 64        | M           | chr11 | 1018257 | A   | T    | ENST00000421673.7:c.4544C>A | ENSP00000406861.2:p.Leu1515Ter | stop gained        | HIGH     | L/*         |                    | SNV           |                                   |                |
| 79        | G           | chr11 | 1018257 | A   | T    | ENST00000421673.7:c.4544C>A | ENSP00000406861.2:p.Leu1515Ter | stop gained        | HIGH     | L/*         |                    | SNV           |                                   |                |
| 90        | M           | chr11 | 1018257 | A   | T    | ENST00000421673.7:c.4544C>A | ENSP00000406861.2:p.Leu1515Ter | stop gained        | HIGH     | L/*         |                    | SNV           |                                   |                |
| 90        | M           | chr11 | 1018276 | T   | C, A | ENST00000421673.7:c.4525A>G | ENSP00000406861.2:p.Thr1509Ala | missense variant   | HIGH     | T/A         |                    | SNV           | deleterious low confidence (0.02) | benign (0.037) |

**SAMPLE ID** - sample identifier; **CHROM** - chromosome number; **POS** - start coordinate of the variant; **REF** - reference allele; **ALT** - alternative allele; **Consequence** - probable effect of this variant; **IMPACT** - classification of the severity of this variant consequence; **Amino acids** - the change in amino acids in the protein coding sequence (reference/alteration); ; **Existing variation** - identifier available in database (dbSNP or COSMIC); **Variant class** Sequence Ontology variant class (single nucleotide variation – SNV, insertion, or deletion). **SIFT** - Scale Invariant Feature Transform prediction and score; **PolyPhen** - Polymorphism Phenotyping v2 prediction and score

**Table S3.** Detailed information of investigated *MUC16* (ENSG00000181143) mutations.

| SAMPLE ID | SAMPLE TYPE | CHROM | POS     | REF | ALT | HGVSc                        | HGVSp                          | Consequence        | IMPACT   | Amino acids | Existing variation | VARIANT CLASS | SIFT                            | PolyPhen       |
|-----------|-------------|-------|---------|-----|-----|------------------------------|--------------------------------|--------------------|----------|-------------|--------------------|---------------|---------------------------------|----------------|
| 11        | G           | chr19 | 8964498 | A   | T   | ENST00000397910.8:c.12272T>A | ENSP00000381008.2:p.Met4091Lys | missense variant   | MODERATE | M/K         |                    | SNV           | deleterious low confidence (0)  | benign (0.028) |
| 11        | G           | chr19 | 8964755 | A   | C,T | ENST00000397910.8:c.12015T>G | ENSP00000381008.2:p.Ala4005%3D | synonymous variant | LOW      | A           |                    | SNV           |                                 |                |
| 15        | G           | chr19 | 8964498 | A   | T   | ENST00000397910.8:c.12272T>A | ENSP00000381008.2:p.Met4091Lys | missense variant   | MODERATE | M/K         |                    | SNV           | deleterious low confidence (0)  | benign (0.028) |
| 15        | G           | chr19 | 8964627 | A   | T   | ENST00000397910.8:c.12143G>A | ENSP00000381008.2:p.Ile4048Lys | missense variant   | MODERATE | I/K         |                    | SNV           | tolerated low confidence (0.09) | benign (0.013) |
| 16        | M           | chr19 | 8964498 | A   | T   | ENST00000397910.8:c.12272T>A | ENSP00000381008.2:p.Met4091Lys | missense variant   | MODERATE | M/K         |                    | SNV           | deleterious low confidence (0)  | benign (0.028) |
| 30        | M           | chr19 | 8964498 | A   | T   | ENST00000397910.8:c.12272T>A | ENSP00000381008.2:p.Met4091Lys | missense variant   | MODERATE | M/K         |                    | SNV           | deleterious low confidence (0)  | benign (0.028) |
| 33        | G           | chr19 | 8964498 | A   | T   | ENST00000397910.8:c.12272T>A | ENSP00000381008.2:p.Met4091Lys | missense variant   | MODERATE | M/K         |                    | SNV           | deleterious low confidence (0)  | benign (0.028) |
| 33        | G           | chr19 | 8964627 | A   | T   | ENST00000397910.8:c.12143G>A | ENSP00000381008.2:p.Ile4048Lys | missense variant   | MODERATE | I/K         |                    | SNV           | tolerated low confidence (0.09) | benign (0.013) |
| 37        | G           | chr19 | 8964498 | A   | T   | ENST00000397910.8:c.12272T>A | ENSP00000381008.2:p.Met4091Lys | missense variant   | MODERATE | M/K         |                    | SNV           | deleterious low confidence (0)  | benign (0.028) |
| 37        | G           | chr19 | 8964627 | A   | T   | ENST00000397910.8:c.12143G>A | ENSP00000381008.2:p.Ile4048Lys | missense variant   | MODERATE | I/K         |                    | SNV           | tolerated low confidence (0.09) | benign (0.013) |
| 47        | G           | chr19 | 8964498 | A   | T   | ENST00000397910.8:c.12272T>A | ENSP00000381008.2:p.Met4091Lys | missense variant   | MODERATE | M/K         |                    | SNV           | deleterious low confidence (0)  | benign (0.028) |
| 48        | M           | chr19 | 8964498 | A   | T   | ENST00000397910.8:c.12272T>A | ENSP00000381008.2:p.Met4091Lys | missense variant   | MODERATE | M/K         |                    | SNV           | deleterious low confidence (0)  | benign (0.028) |
| 56        | M           | chr19 | 8964498 | A   | T   | ENST00000397910.8:c.12272T>A | ENSP00000381008.2:p.Met4091Lys | missense variant   | MODERATE | M/K         |                    | SNV           | deleterious low confidence (0)  | benign (0.028) |
| 57        | G           | chr19 | 8964498 | A   | T   | ENST00000397910.8:c.12272T>A | ENSP00000381008.2:p.Met4091Lys | missense variant   | MODERATE | M/K         |                    | SNV           | deleterious low confidence (0)  | benign (0.028) |
| 62        | M           | chr19 | 8964498 | A   | T   | ENST00000397910.8:c.12272T>A | ENSP00000381008.2:p.Met4091Lys | missense variant   | MODERATE | M/K         |                    | SNV           | deleterious low confidence (0)  | benign (0.028) |
| 63        | G           | chr19 | 8964498 | A   | T   | ENST00000397910.8:c.12272T>A | ENSP00000381008.2:p.Met4091Lys | missense variant   | MODERATE | M/K         |                    | SNV           | deleterious low confidence (0)  | benign (0.028) |
| 63        | G           | chr19 | 8964627 | A   | T   | ENST00000397910.8:c.12143G>A | ENSP00000381008.2:p.Ile4048Lys | missense variant   | MODERATE | I/K         |                    | SNV           | tolerated low confidence (0.09) | benign (0.013) |
| 64        | M           | chr19 | 8964498 | A   | T   | ENST00000397910.8:c.12272T>A | ENSP00000381008.2:p.Met4091Lys | missense variant   | MODERATE | M/K         |                    | SNV           | deleterious low confidence (0)  | benign (0.028) |
| 64        | M           | chr19 | 8964627 | A   | T   | ENST00000397910.8:c.12143G>A | ENSP00000381008.2:p.Ile4048Lys | missense variant   | MODERATE | I/K         |                    | SNV           | tolerated low confidence (0.09) | benign (0.013) |

| SAMPLE ID | SAMPLE TYPE | CHROM | POS     | REF | ALT | HGVSc                        | HGVSp                          | Consequence      | IMPACT   | Amino acids | Existing variation | VARIANT CLASS | SIFT                           | PolyPhen       |
|-----------|-------------|-------|---------|-----|-----|------------------------------|--------------------------------|------------------|----------|-------------|--------------------|---------------|--------------------------------|----------------|
| 80        | M           | chr19 | 8964498 | A   | T   | ENST00000397910.8:c.12272T>A | ENSP00000381008.2:p.Met4091Lys | missense variant | MODERATE | M/K         |                    | SNV           | deleterious low confidence (0) | benign (0.028) |
| 90        | M           | chr19 | 8964498 | A   | T   | ENST00000397910.8:c.12272T>A | ENSP00000381008.2:p.Met4091Lys | missense variant | MODERATE | M/K         |                    | SNV           | deleterious low confidence (0) | benign (0.028) |

**SAMPLE ID** - sample identifier; **CHROM** - chromosome number; **POS** - start coordinate of the variant; **REF** - reference allele; **ALT** - alternative allele; **Consequence** - probable effect of this variant; **IMPACT** - classification of the severity of this variant consequence; **Amino acids** - the change in amino acids in the protein coding sequence (reference/alteration); ; **Existing variation** - identifier available in database (dbSNP or COSMIC); **Variant class** Sequence Ontology variant class (single nucleotide variation – SNV, insertion, or deletion). **SIFT** - Scale Invariant Feature Transform prediction and score; **PolyPhen** - Polymorphism Phenotyping v2 prediction and score
